# Supplementary material for: Impact of the COVID-19 Pandemic on the Use and Outcomes of Cardiac Procedures in COPD Patients
Source: MDPI journal article supplement (doi:10.3390/jcm11133924), 2022-07-05
Supplement: s1 [file s1]

**Table S1.** International Classification of Disease, 10th edition, (ICD-10) codes for the clinical diagnoses and procedures used in this investigation.

| <b>Procedures</b>                   | <b>ICD-10 codes</b>                                                                       |
|-------------------------------------|-------------------------------------------------------------------------------------------|
| Percutaneous coronary intervention. | 02703XX, 02704xx, 02713XX, 02714xx, 02723XX, 02724xx, 02733XX, 02734xx                    |
| Coronary artery bypass graft        | 02100XX, 02110XX, 02120XX, 02130XX                                                        |
| Open heart valve replacement        | 02RF0XX, 02RG0XX, 02RH0XX, 02RJ0XX                                                        |
| Trans-catheter valve implantation   | 02RF3xx; 02RG3xx; 02RH3xx; 02RJ3xx                                                        |
| Oxygen prior to hospital admission  | Z99.81                                                                                    |
| Non-invasive mechanical ventilation | 5A09357, 5A09457, 5A09557                                                                 |
| Invasive mechanical ventilation     | 5A1945Z, 5A1955Z, 5A1935Z                                                                 |
| Dialysis                            | 5A1D xxx                                                                                  |
| <b>Diagnosis</b>                    | <b>ICD-10 codes</b>                                                                       |
| Diabetes                            | E10.xxx ,E11.xxx                                                                          |
| Asthma                              | J45                                                                                       |
| Stroke                              | I60-I63                                                                                   |
| Peripheral vascular disease         | I70.x, I71.x, I73.1, I73.8, I73.9, I77.1, I79.0, I79.2, K55.1, K55.8, K55.9, Z95.8, Z95.9 |
| Ischemic heart disease              | I20-I25                                                                                   |
| Valvular heart disease              | I05-I08, I33-I39                                                                          |
| Atrial fibrillation                 | I48.0, I48.1, I48.2, I48.91                                                               |
| Heart failure                       | I09.9, I11.0, I13.0, I13.2, I25.5, I42.0, I42.5–I42.9, I43.x, I50.x, P29.0                |
| Chronic kidney disease              | N18                                                                                       |
| COVID 19                            | B34.2, B97.29, U07.1                                                                      |

**Table S2.** In hospital mortality of patients with Chronic Obstructive Pulmonary Disease who underwent a percutaneous coronary intervention, coronary artery bypass graft, open surgical valve replacement, transcatheter valve implantation or any of these procedures from 2016 to 2020 in Spain. Analysis of the Spanish National Hospital Discharge Database.

|                                     | 2016      | 2017      | 2018      | 2019      | 2020      | <i>p</i> for trend |
|-------------------------------------|-----------|-----------|-----------|-----------|-----------|--------------------|
| Percutaneous coronary intervention. | 111(4.01) | 125(4.26) | 120(3.97) | 126(3.96) | 126(4.72) | 0.392              |
| Coronary artery bypass graft        | 19(4.94)  | 22(4.25)  | 15(3.5)   | 23(5.01)  | 21(5.4)   | 0.084              |
| Open heart valve replacement        | 42(6.72)  | 44(6.54)  | 39(6.7)   | 41(6.74)  | 43(8.78)  | 0.389              |
| Trans-catheter valve implantation   | 10(4.85)  | 12(4.24)  | 12(3.89)  | 14(3.56)  | 15(4.26)  | 0.429              |
| Any procedure                       | 176(4.55) | 186(4.17) | 184(4.09) | 194(4.33) | 200(5.32) | 0.003              |

**Table S3.** Demographic and clinical characteristics and in-hospital outcomes of patients with chronic obstructive pulmonary disease who underwent cardiac procedure in Spain in 2020 according to the presence of infection with COVID-19. Analysis of the Spanish National Hospital Discharge Database.

| <b>Variables</b>                           | <b>No COVID 19 infection</b> | <b>COVID-19 infection</b> | <b>p-value</b> |
|--------------------------------------------|------------------------------|---------------------------|----------------|
| N                                          | 3727(100)                    | 30(100)                   | NA             |
| PCI n (%)                                  | 2648(71.05)                  | 22(73.33)                 | 0.591          |
| CABG. n (%)                                | 385(10.33)                   | 4(13.33)                  | 0.783          |
| OVRP. n (%)                                | 486(13.04)                   | 4(13.33)                  | 0.610          |
| TVI. n (%)                                 | 350(9.39)                    | 2(6.67)                   | 0.962          |
| Men n (%)                                  | 3171(85.08)                  | 27(90)                    | 0.451          |
| Women n (%)                                | 556(14.92)                   | 3(10)                     |                |
| Age. mean (SD)                             | 71.68(9.46)                  | 73(10)                    | 0.449          |
| CCI index. mean (SD)                       | 3.08(1.7)                    | 4.27(1.98)                | <0.001         |
| Diabetes, n (%)                            | 1501(40.27)                  | 16(53.33)                 | 0.146          |
| Asthma n (%),n (%)                         | 105(2.82)                    | 1(3.33)                   | 0.865          |
| Stroke n (%)                               | 39(1.05)                     | 0(0)                      | 0.573          |
| Peripheral vascular disease n (%)          | 507(13.6)                    | 2(6.67)                   | 0.269          |
| Ischemic heart disease n (%)               | 3178(85.27)                  | 27(90)                    | 0.466          |
| Valvular heart disease n (%)               | 1336(35.85)                  | 11(36.67)                 | 0.926          |
| Atrial fibrillation n (%)                  | 922(24.74)                   | 11(36.67)                 | 0.132          |
| Heart failure n (%)                        | 968(25.97)                   | 14(46.67)                 | 0.010          |
| Chronic kidney disease n (%)               | 616(16.53)                   | 8(26.67)                  | 0.137          |
| Oxygen prior to hospital admission, n (%)  | 151(4.05)                    | 1(3.33)                   | 0.842          |
| Non-invasive mechanical ventilation. n (%) | 131(3.51)                    | 4(13.33)                  | 0.004          |
| Invasive mechanical ventilation. n (%)     | 234(6.28)                    | 4(13.33)                  | 0.114          |
| Dialysis. n (%)                            | 74(1.99)                     | 2(6.67)                   | 0.070          |
| Admission to ICU. n (%)                    | 1719(46.12)                  | 14(46.67)                 | 0.953          |
| LOHS, mean (SD)                            | 9.31(8.68)                   | 16.6(13.48)               | 0.001          |
| IHM. n (%)                                 | 189(5.07)                    | 11(36.67)                 | <0.001         |

**Table S4.** Demographic and clinical characteristics and in-hospital outcomes of patients with chronic obstructive pulmonary disease who underwent cardiac procedure in Spain in 2020 in patients with COVID-19 infection and matched patients without COVID-19 who underwent cardiac procedure in Spain in 2019. Analysis of the Spanish National Hospital Discharge Database.

| <b>Variables</b>                           | <b>Matched patients without COVID-19 infection *</b> | <b>COVID-19 infection</b> | <b>p-value</b> |
|--------------------------------------------|------------------------------------------------------|---------------------------|----------------|
| N                                          | 30(100)                                              | 30(100)                   | NA             |
| PCI n (%)                                  | 22(73.33)                                            | 22(73.33)                 | NA             |
| CABG. n (%)                                | 4(13.33)                                             | 4(13.33)                  | NA             |
| OVRP. n (%)                                | 4(13.33)                                             | 4(13.33)                  | NA             |
| TVL. n (%)                                 | 2(6.67)                                              | 2(6.67)                   | NA             |
| Men n (%)                                  | 27(90)                                               | 27(90)                    |                |
| Women n (%)                                | 3(10)                                                | 3(10)                     | NA             |
| Age. mean (SD)                             | 73(10)                                               | 73(10)                    | NA             |
| CCI index. mean (SD)                       | 2.9(1.45)                                            | 4.27(1.98)                | 0.003          |
| Diabetes, n (%)                            | 13(43.33)                                            | 16(53.33)                 | 0.438          |
| Asthma n (%),n (%)                         | 1(3.33)                                              | 1(3.33)                   | 0.999          |
| Stroke n (%)                               | 1(3.33)                                              | 0(0)                      | NA             |
| Peripheral vascular disease n (%)          | 5(16.67)                                             | 2(6.67)                   | 0.228          |
| Ischemic heart disease n (%)               | 26(86.67)                                            | 27(90)                    | 0.688          |
| Valvular heart disease n (%)               | 9(30)                                                | 11(36.67)                 | 0.584          |
| Atrial fibrillation n (%)                  | 8(26.67)                                             | 11(36.67)                 | 0.405          |
| Heart failure n (%)                        | 5(16.67)                                             | 14(46.67)                 | 0.012          |
| Chronic kidney disease n (%)               | 2(6.67)                                              | 8(26.67)                  | 0.038          |
| Oxygen prior to hospital admission, n (%)  | 0(0)                                                 | 1(3.33)                   | NA             |
| Non-invasive mechanical ventilation. n (%) | 0(0)                                                 | 4(13.33)                  | NA             |
| Invasive mechanical ventilation. n (%)     | 1(3.33)                                              | 4(13.33)                  | 0.161          |
| Dialysis. n (%)                            | 0(0)                                                 | 2(6.67)                   | 0.150          |
| Admission to ICU. n (%)                    | 14(46.67)                                            | 14(46.67)                 | 0.999          |
| LOHS, mean (SD)                            | 7.8(7.34)                                            | 16.6(13.48)               | 0.006          |
| IHM. n (%)                                 | 1(3.33)                                              | 11(36.67)                 | 0.001          |

\* Each patient with COVID-19 infection was matched with a patient without COVID-19 infection who underwent the same procedure with identical age, sex and month of intervention in year 2019.
